# Supplementary material
Source: PubMed Central journal article supplement (PMC2832499)

## Supplemental Data

**Table S1. Heterogeneity of rRNA 3' ends**

Calculations are based on at least 96 clones for each PCR product shown in Fig. 3. For each sequence category, values are in percentile versus total number of sequenced clones from a specific PCR product.

| 3' rRNA sequence categories                      | 9S, mock | 9S, RET1 RNAi | 12S, mock | 12S, RET1 RNAi |
|--------------------------------------------------|----------|---------------|-----------|----------------|
| 3' deletions extending into mature rRNA sequence | 0        | 3             | 0         | 1.6            |
| No U-tail                                        | 0        | 3             | 0         | 0              |
| 1-8 Us                                           | 0        | 9             | 60        | 35             |
| 9-20 Us                                          | 100      | 28            | 40        | 40             |
| 3' lengthening, no U- tail                       | 0        | 11            | 0         | 0              |
| 3' lengthening, plus 1-8 Us                      | 0        | 30            | 0         | 3              |
| 3' lengthening plus 9-20 Us                      | 0        | 16            | 0         | 20             |

### *Total RNA isolation*

Cells were grown in SDM 79 with 10 % serum (Clontech) and 0.01 mg/ml hemin chloride (Calbiochem) to  $4-6 \times 10^6$ / ml. Unless otherwise specified, 50 ml of culture was centrifuged at 5000g for 10 min. Pellets were washed with ice-cold PBS, spun down under same conditions and stored at  $-80^{\circ}\text{C}$ . Frozen cell pellets were immediately re-suspended in 4 ml of ice-cold Buffer D (4M guanidine isothiocyanate, 25 mM sodium citrate (pH 7.0), 0.5 % sarcosyl, 0.1 M  $\beta$ -mercaptoethanol). Cell lysate was mixed with 0.5 ml of 2M sodium acetate (pH 4.0) and 5 ml of water-saturated phenol. 1.5 ml

chloroform/isoamyl alcohol 49:1 was added and mixture incubated for 15 min with gentle rocking at ambient temperature. After centrifugation at 10,000 g for 15 min, the supernatant was transferred into fresh tube and extracted with 5 ml of chloroform/isoamyl alcohol. RNA was precipitated with 5 ml of isopropanol at -20<sup>0</sup>C for 1 hour, collected by centrifugation at 10,000 g for 15 min and washed with 80 % ethanol. The pellet was re-dissolved in 400 µl water and precipitated with ethanol by standard techniques. Expected yield is 600-800 µg of RNA with OD<sub>260/280</sub> ratio of 1.6-1.8. For Northern blotting, primer extension and capping with guanylyltransferase experiments, RNA was treated with DNase I (Invitrogen) following the company's protocol. For real-time PCR and cRT-PCR, additional purification step with RNase Easy (Qiagen) columns was included.

#### *Northern blotting*

The 20 cm-long, 8 mm-thick 1.6 % agarose formaldehyde gels were prepared in 1x MOPS buffer as described (Sambrook *et al.* 1989) and run for 3 hr at 100 V. The polyacrylamide/8M urea gels (5% for mRNA blotting and 10% for gRNA blotting) were prepared in 20x20x0.15 cm format, and run at 20 W for 2.5 hr. For agarose gels, 15 µg of RNA was resuspended in 20 µl of 1x loading buffer (Ambion). For acrylamide gels, 10 µg of RNA was resuspended in 95 % formamide, 10 mM EDTA, 0.05 % xylene cyanol, 0.05 % Bromphenol Blue buffer. Samples were heated at 65<sup>0</sup>C for 5 min prior to loading. To visualize molecular mass markers on the membrane, 1 µg of the 0.1-2 kb RNA ladder (Invitrogen) was labeled with T4 RNA ligase and [ $\alpha$ -<sup>32</sup>P]pCp. RNA on

agarose gel was transferred on to the BrightStar-Plus membrane (Ambion) in  $10 \times$  SSC, 10 mM NaOH buffer for 2 hours using vacuum blotter (model 785, Bio-Rad). RNA from the acrylamide gel was transferred to the same membrane in  $\frac{1}{2}$  TBE buffer for 2 hours at 90 V using a cooling blotter unit (TE series, Hoefer). The membranes were exposed twice to UV light at  $120 \text{ mJ/cm}^2$  using HL 2000 HibriLinker (UVP) and stained with 0.04 % of Methylene Blue in 0.5 M Na Acetate (pH 5.0) to check transfer.

Following RNA transcripts were detected with single-stranded DNA probes produced by asymmetric PCR: COI, ND1, ND4, MURF1, MURF5 and RPS12 (edited and unedited). The template was generated with oligonucleotides used for real-time RT-PCR analysis and gel-purified. The PCR reactions were set up with 10 pmol of 5' labeled oligonucleotides and  $\sim 0.5$  pmol of template. Membranes were pre-hybridized for 2 hours at  $55^\circ\text{C}$  temperature using HL 2000 HibriLinker (UVP) in 20 ml of  $6 \times$  SSPE,  $5 \times$  Denhardt's solution, 0.5 % SDS, 0.2 mg/ml of denatured salmon sperm DNA. Hybridization was performed overnight in 4-5 ml of  $6 \times$  SSPE,  $5 \times$  Denhardt's solution, 0.5 % SDS, 20  $\mu\text{g/ml}$  of yeast tRNA(Sigma),  $3\text{-}4 \times 10^6$  cpm/ml of DNA probe. Membrane was washed 3 times with  $2 \times$  SSC, 0.1 % SDS solution at  $55^\circ\text{C}$  and 1 time with  $1 \times$  SSC, 0.5 % SDS at  $55^\circ\text{C} - 65^\circ\text{C}$  (temperature was increased if background appeared or near-melting point stringency was required, as in the case of 5' pre-edited RPS12 mRNA). Membranes was stripped by boiling for 20 min in 0.1 % SDS and stored in plastic bag at  $-20^\circ\text{C}$ . Guide RNA and tRNA hybridizations with oligonucleotides were performed at  $42^\circ\text{C}$  in ULTRAhyb -Oligo Hybridization solution as recommended by the manufacturer (Ambion).

### *gRNA labeling*

Total DNase-treated RNA (5 µg) was re-suspended in 10 µl of water, incubated at 85<sup>0</sup> for 2 min and placed on ice for 2 min. RNA samples were mixed with 10 µl of reaction mix (60 mM Tris-HCl pH 8.0, 6 mM MgCl<sub>2</sub>, 5 mM DTT, 20 U of RNaseout (Invitrogen), 10 µCi of [ $\alpha$ -<sup>32</sup>P] GTP) and 1 µg of guanylyltransferase, and incubated at 37<sup>0</sup>C for 30 min. Vaccinia virus guanylyltransferase was purified from *E. coli* carrying pET-HisD1/D12 plasmid ((Luo *et al.* 1995), kind gift of Stuart Shuman, MSKCC). Reaction was stopped with equal volume of 0.2 % SDS plus 1 µg of proteinase K, and incubation continued for 20 min. The reaction mix was extracted with phenol (pH 5.0), re-extracted with phenol/chloroform (pH 8.0), and precipitated with ethanol. Products were separated on 9 % polyacrylamide/urea gel.

### *Quantitative RT-PCR*

cDNA was synthesized with Applied Biosystems RT-PCR kit as follows:

| <b><u>Components</u></b> | <b><u>Volume (µl)</u></b> |
|--------------------------|---------------------------|
| RNA (6 µg)               | x                         |
| 10x RT Buffer            | 4                         |
| 25mM MgCl <sub>2</sub>   | 8.8                       |
| dNTP                     | 8                         |
| Random Hexamer           | 2                         |
| RNase Inhibitor          | 0.8                       |
| H <sub>2</sub> O         | up to 39.5 µl             |

Reaction was split in two and 0.25  $\mu$ l (12.5U) of Multiscribe Reverse Transcriptase (50U/ $\mu$ l) was added to one tube and 0.25  $\mu$ l H<sub>2</sub>O to the other serving as a No-RT control. Samples were placed into a thermocycler for 1 cycle of: 25°C 10min, 48°C 30min., 95°C 5min., 4°C hold. For the qRT- PCR reaction, cDNA was diluted with 20  $\mu$ l H<sub>2</sub>O.

For each PCR reaction in the 96-well plate:

| <b><u>Components</u></b> | <b><u>Volume (<math>\mu</math>l)</u></b> |
|--------------------------|------------------------------------------|
| SYBR Green Mix           | 12.5                                     |
| 1.5 $\mu$ M Primer 1     | 5                                        |
| 1.5 $\mu$ M Primer 2     | 5                                        |
| cDNA products            | 2.5                                      |

cDNA produced from the one reaction was used to analyze up to 15 transcripts. Samples were run in triplicate and the Ct values from each sample were averaged. Nuclearly encoded  $\beta$ -tubulin mRNA and 18s rRNA were used as internal normalization controls.

Reactions were carried out in the Eppendorf Realplex2 S cycler under following conditions: 50°C for 2 min., 95°C for 10 min., followed by 45 cycles of 95°C for 15 sec. and 60°C for 1 min. Thermal dissociations were used to confirm generation of a single amplicon. PCR products were also analyzed by electrophoresis in 2.0% agarose gel. Oligonucleotide primers were designed with Beacon Designer 3 and purchased from Invitrogen. Relative changes in target amplicons were determined by using the Pfaffl method with PCR efficiencies calculated by linear regression using LinRegPCR (Ramakers *et al.* 2003)

*Purification of the GRBC1/2 complex*

*GRBC1* and 2 genes lacking the 5' regions corresponding to predicted mitochondrial importation signals (amino acids 24-460 and 21-491, respectively) were cloned into pDUET-1 vector. GRBC2 was expressed as N-terminally 6His-tagged protein. Six liters of bacterial culture were grown in 2YT media at 37°C to 0.3 OD<sup>600</sup> and the temperature was lowered to 10°C over 30-60 min. Protein expression was induced with 1 mM of IPTG and cultivation continued for 3 hours. All chromatographic steps were performed on AKTA purifier (GE) at 4 °C. The cell pellet (~40 g) was resuspended in 200 ml of 50 mM HEPES buffer (pH 7.8), 50 mM NaCl and passed through a French pressure cell at 12000 Psi. Sodium chloride was adjusted to 300 mM and the extract centrifuged at 200,000 g for 45 min. The supernatant was filtered through a low-protein binding 0.45 micron filter and loaded onto a 10 ml Talon metal affinity column (Clontech), washed with 100 ml of 50 mM HEPES (pH 8.0), 300 mM NaCl and with 100 ml of 50 mM HEPES (pH 8.0), 300 mM NaCl and 10 mM imidazole. Protein was eluted with the same buffer containing 200 mM of imidazole, diluted four-fold and immediately loaded on 15 ml column with Poros HS20 (Roche), which had been pre-equilibrated with 50 mM KCl, 50 mM HEPES (pH 8.0), 1 mM DTT. The column was developed with linear 50-500 mM KCl, 20 column volume gradient at 10 ml/min. Fractions eluting at ~ 250 mM KCl were pooled, diluted 3 fold (~ 50 ml) and loaded on 5 ml HiTrap HQ column (GE Healthcare). Linear 50-500 mM gradient in 25 mM Tris-HCl, pH 7.8, (20 column volumes was applied at 1 ml/min; GRBC1/2 eluted as a single symmetrical peak at ~ 300 mM KCl. The obtained protein was typically >95% pure as estimated by Sypro Ruby staining of the SDS-acrylamide gel. The final fraction was supplemented with glycerol to 10%, flash frozen in liquid nitrogen and stored at -80 °C.

For size exclusion chromatography the protein sample (50  $\mu$ l, 5 mg/ml) was loaded onto a Superose 12 column (GE Healthcare) in 20 mM HEPES, pH 7.5, 150 mM KCl at 0.1 ml/min. Molecular mass standards used to estimate Stokes' radius were catalase, aldolase, albumin and ovalbumin.

**Table S1. Heterogeneity of rRNA 3' ends.**

For each sequence category, values are in percentile versus total number (at least 96) of sequenced clones from a specific PCR product.

| <b>3' sequence categories</b>                    | <b>9S, mock</b> | <b>9S,<br/>RET1 RNAi</b> | <b>12S, mock</b> | <b>12S,<br/>RET1 RNAi</b> |
|--------------------------------------------------|-----------------|--------------------------|------------------|---------------------------|
| 3' deletions extending into mature rRNA sequence | 0               | 3                        | 0                | 2                         |
| No U-tail                                        | 0               | 3                        | 0                | 0                         |
| 1-8 Us                                           | 0               | 9                        | 60               | 35                        |
| 9-20 Us                                          | 100             | 28                       | 40               | 40                        |
| 3' lengthening, no U- tail                       | 0               | 11                       | 0                | 0                         |
| 3' lengthening, plus 1-8 Us                      | 0               | 30                       | 0                | 3                         |
| 3' lengthening plus 9-20 Us                      | 0               | 16                       | 0                | 20                        |



**Table S2. Oligonucleotides used in this study**

| Name                     | Sequence, 5'-3'                                        | Polarity | Application                       |
|--------------------------|--------------------------------------------------------|----------|-----------------------------------|
| <b>Northern Blotting</b> |                                                        |          |                                   |
| A304                     | TGAACAATCAATCATGGTAATAAGTAGACGATG                      |          | oligo probe<br>12S rRNA           |
| A504                     | ACGGCTGGCATCCATTTTC                                    |          | oligo probe<br>9S rRNA            |
| A 850                    | CAAATCGGACGGGATATGGTGCATTCGGCCAAGTA<br>TGGTCG          |          | oligo probe<br>5S                 |
| A662                     | CATTCAATTACTCTAATTTAATTTTATTTTTGTGC                    |          | oligo probe<br>Murf2 (II)<br>gRNA |
| A872                     | GGGGACCATTCGGACTGCAGCCG                                |          | tRNA <sup>Cys</sup>               |
| A798                     | TAATTAAATCTTCTCATTGTCACTGTCTTATACTAC<br>GATTGAGTTTGTAT |          | Oligo probe<br>CO3 gRNA<br>[147]  |
| A661                     | TATTTACTCACTTTATCTCACTACATAAATCCATGA<br>T              |          | Oligo probe<br>RPS12<br>gRNA [64] |
| A663                     | TAATTATCATATCACTGTCAAATCTGATTCGTTAT                    |          | Oligo probe<br>A6 gRNA<br>[14]    |
| A343                     | TGGTAAAGTTCCCCGTGTTGA                                  |          | Oligo probe<br>18S rRNA           |
| A359                     | CGACGGAGAGCTTCTTTTGAATA                                | sense    | unedited<br>RPS12<br>mRNA         |
| A360                     | CCCCCACCCAAATCTTT                                      | anti     | unedited<br>RPS12<br>mRNA         |
| A357                     | CGTATGTGATTTTTGTATGGTTGTTG                             | sense    | edited<br>RPS12<br>mRNA           |
| A358                     | ACACGTCGGTACCGGAACT                                    | anti     | edited<br>RPS12<br>mRNA           |
| A297                     | CAATCTGACCATTCCATGTGTGACTACC                           | sense    | ND4 mRNA                          |

|                |                                                           |            |                  |
|----------------|-----------------------------------------------------------|------------|------------------|
| A296           | AGATAATTCAGTAACAAGGCCAGCAACAAG                            | anti       | ND4 mRNA         |
| A296           | AGATAATTCAGTAACAAGGCCAGCAACAAG                            | anti sense | ND1              |
| A295           | GGACTGCTTCTTGATGGATTACGTTTACC                             | sense      | ND1              |
| A294           | AAAGCCAATACAAATACAAAGGTAAGTTAG                            | anti       | MURF1            |
| A293           | GTTTACTACTTGCATGTCTCTTTCTTTG                              | sense      | MURF1            |
| A302           | ACTAAGCAACCAAATCCTCCAATAAACATTC                           | sense      | CO1 mRNA         |
| A301           | TGCCTATAACTATGGGTGGGTTTACAAAC                             | anti       | CO1 mRNA         |
| B105           | ATATACTATAACTCCGATAACGAATCAGATTTTGAC<br>AGTGATATGATAATTAT | anti       | gA6[14]          |
| B108           | ATAATTATCATATCACTGTCAAATCTGATTCGTTA<br>TCGGAGTTATAGTATAT  | sense      | gA6[14]          |
| <b>qRT-PCR</b> |                                                           |            |                  |
| A345           | TGACGCCGGACACAACAG                                        | anti       | $\beta$ -tubulin |
| A344           | TTCCGCACCCTGAAACTGA                                       | sense      | $\beta$ -tubulin |
| A343           | TGGTAAAGTTCCCCGTGTTGA                                     | anti       | 18s rRNA         |
| A342           | CGGAATGGCACCACAAGAC                                       | sense      | 18s rRNA         |
| A304           | TGAACAATCAATCATGGTAATAAGTAGACGATG                         | anti       | 12S rRNA         |
| A303           | GGGCAAGTCCTACTCTCCTTTACAAAG                               | sense      | 12S rRNA         |
| A302           | ACTAAGCAACCAAATCCTCCAATAAACATTC                           | anti       | CO1              |
| A301           | TGCCTATAACTATGGGTGGGTTTACAAAC                             | sense      | CO1              |
| A300           | GCGTGTATTAATGCTGATACTGGGATAGG                             | anti       | ND5              |
| A299           | TTTCTATATGTTTGTTAGTAGGATGTGCGTTC                          | sense      | ND5              |
| A298           | TGCTATAAATACTAAACCCAACACAATTACACTAT<br>C                  | anti       | ND4              |
| A297           | CAATCTGACCATTCCATGTGTGACTACC                              | sense      | ND4              |
| A296           | AGATAATTCAGTAACAAGGCCAGCAACAAG                            | anti       | ND1              |
| A295           | GGACTGCTTCTTGATGGATTACGTTTACC                             | sense      | ND1              |
| A294           | AAAGCCAATACAAATACAAAGGTAAGTTAG                            | anti       | Murf1            |
| A293           | GTTTACTACTTGCATGTCTCTTTCTTTG                              | sense      | Murf1            |
| A281           | TCCGCACACGCAACGACTTC                                      | anti       | RET1             |
| A280           | TGAGCAGTGGTGGTGGAGGTAG                                    | sense      | RET1             |

|                                  |                                  |       |          |
|----------------------------------|----------------------------------|-------|----------|
| A525                             | TGTTCCCTTATTCATTTTGTGCATTAC      | sense | Murf5    |
| A256                             | TGTGTATAATGTTAAGTCAAATTTAAAATGC  | anti  | Murf5    |
| <b>3' End Analysis – cRT-PCR</b> |                                  |       |          |
| A863                             | CAAATTATAAATTATTATTA ACTATTCC    |       | 9S cDNA  |
| A861                             | TATACAAAAAATCTTTCAAAAAATAAACC    |       | 9S       |
| A862                             | GAAATTAAAAAGGTATTGTTGCCAC        |       | 9S       |
| A866                             | CTATAAATATGTATCTAAATATAAAACAAC   |       | 12S cDNA |
| A864                             | AAATAATACAAATAATAATTTACTACACGG   |       | 12S      |
| A865                             | TTTGAAATTATAAAAGGTTTCGAGCAGG     |       | 12S      |
| A957                             | ACGTTACATAAACTAACATACC           |       | ND1 cDNA |
| A955                             | TTATTTACAATGGGATTCATTAATTTTC     |       | ND1      |
| A956                             | CATAAGACAGATAAAACGAGTATAAATATAAC |       | ND1      |

**A** TAP-tagged RET1 is incorporated into heterogeneous high-molecular mass complexes

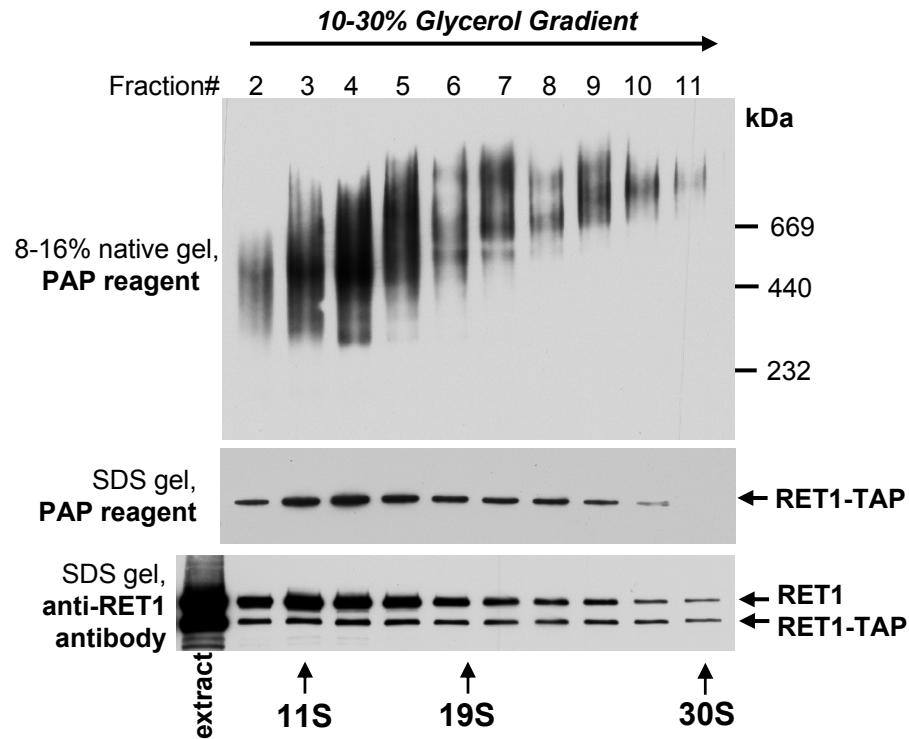

Mitochondrial extract was fractionated on 10-30% glycerol gradients (SW41 rotor, for 20 hr at 100,000g). Fractions (0.65 ml) were analyzed for the presence of tagged (PAP reagent) and endogenous (anti-RET1 antibody) RET1 proteins by electrophoresis in 8-16% PAGE. Tris-glycine gels were run under native or denaturing (SDS) conditions and electroblotted onto nitrocellulose membranes for immunodetection.

**C**

Overexpression of active RET1 increases the overall abundance of fully-processed gRNAs and stimulates precursor processing

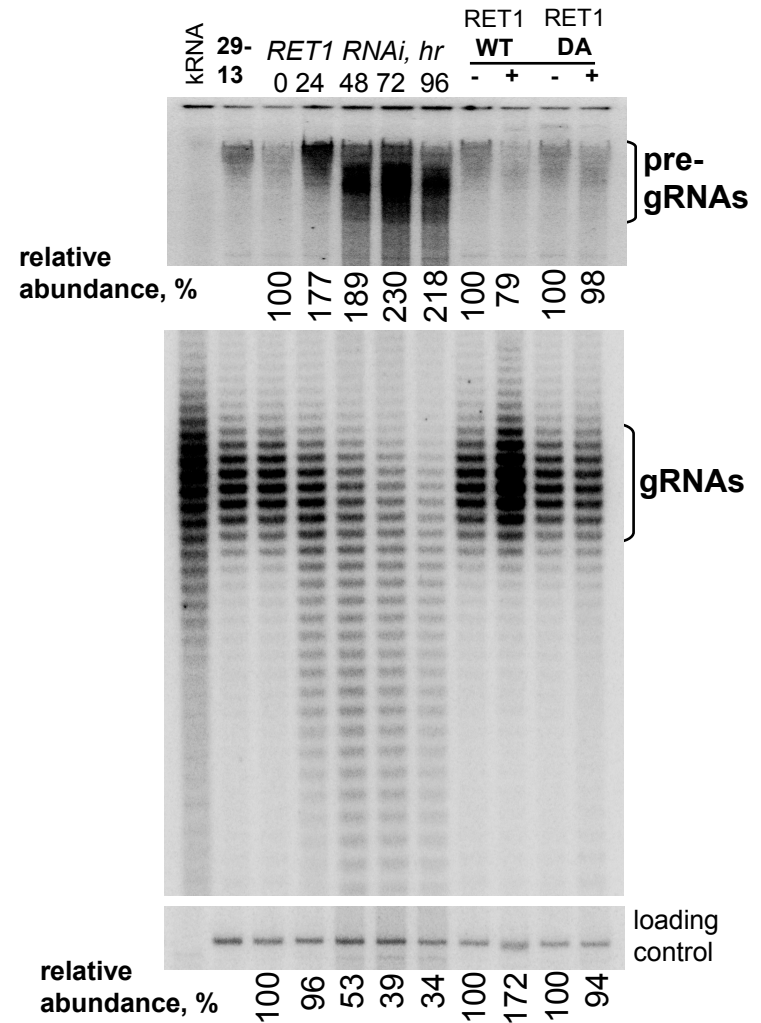

Supplement: supp_30_6_1555__1.pdf [file supp_30_6_1555__1.pdf]
